# Supplementary material for: 3D-transition metal mono-substituted Keggin polyoxotungstate with an antenna molecule: synthesis, structure and characterization
Source: Royal Society of Chemistry journal article supplement (doi:10.1039/b805714a), 2008-01-01
Supplement: b805714a.pdf [file b805714a.pdf]

## 3D-Transition Metal Mono-Substituted Keggin

### Polyoxotungstate with an Antenna Molecule: Synthesis, Structure and Characterization

Hongsheng Liu<sup>a</sup>, Carlos J. Gómez-García<sup>b</sup>, Jun Peng<sup>\*a</sup>, Jingquan Sha<sup>a</sup>, Yangguang Li<sup>a</sup>,  
Yechao Yan<sup>a</sup>

<sup>a</sup> Key Laboratory of Polyoxometalate Science of Ministry of Education Faculty of Chemistry, Northeast Normal University, Changchun, Jilin, 130024, P. R. China

<sup>b</sup> Instituto de Ciencia Molecular. ICMol. Universitat de Valencia. Pol La Coma s/n 46980 Paterna. Spain

## Supplementary Materials

### Thermogravimetric (TG) Analysis

Thermogravimetric analyses of compounds **1**, **2** and **3** were carried out in nitrogen atmosphere with a heating rate of 10 °C min<sup>-1</sup> in the temperature range 42-1000 °C. The TG/DTA curves of compounds **1-3** are shown in Figure S10-S12, respectively. The TG curve of compound **1** shows three distinct stages of weight loss in the temperature range 42-680 °C. The first weight loss of 3.9 % in the temperature range 42–140 °C corresponds to the release of crystallization water and is in agreement with the calculated value of 3.79 %. The successive weight loss of the second step (12 %) from 220 °C to 550 °C is in good agreement with the loss of the six protonated Im molecules (calc. 12.26 %). As expected, the coordinated Im ligand is lost at a higher temperature in a third step from 570 to 680 °C. In this third step the weight loss (3.6 %) is higher than the expected value for one Im molecule, indicating that the lost of the coordinated Im ligand is accompanied by the lost of some oxygen atoms leaving a residue of WO<sub>3</sub>, NiO and SiO<sub>2</sub> of 80.5 %, is in good agreement with the calculated value of 80.59 %. The DTA curve reveals two endothermic peaks at 66 °C and 288 °C which correspond to the loss of lattice water and the protonated Im molecules,

respectively. An additional exothermic peak at 631 °C corresponds to the oxidation of the coordinated Im ligand and/or to phase transformations of the residual inorganic oxides. As expected, the thermal behaviors of **2** and **3** are very similar to that of **1**.

The IR spectra (Figures S8-S9) and XRPD patterns (Figures S13-S14) of compounds **1** and **2** after heating to 550 °C have been performed, which strongly support the TG/DTA results, and suggest that the polyanions  $[\text{SiW}_{11}\text{O}_{39}\text{ZIm}]^{6-}$  ( $\text{Z} = \text{Ni}^{\text{II}}, \text{Mn}^{\text{II}}$  and  $\text{Co}^{\text{II}}$ ) are remarkably stable until 550 °C.

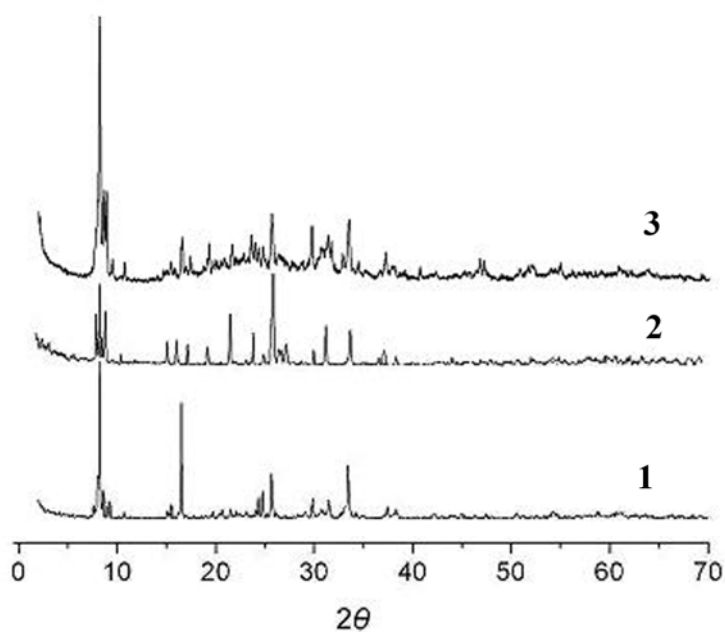

**Figure S1.** Experimental XRPD patterns of compound **1**, **2** and **3**.

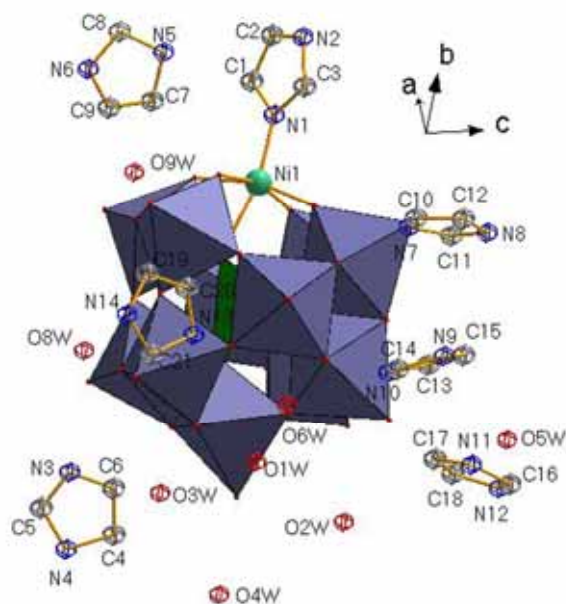

**Figure S2.** The molecular structure of compound **1**, showing the positions of polyanion and counteractions  $\text{HIm}^+$ , and  $\text{H}_2\text{O}$  molecules. Hydrogen atoms are omitted for clarity.

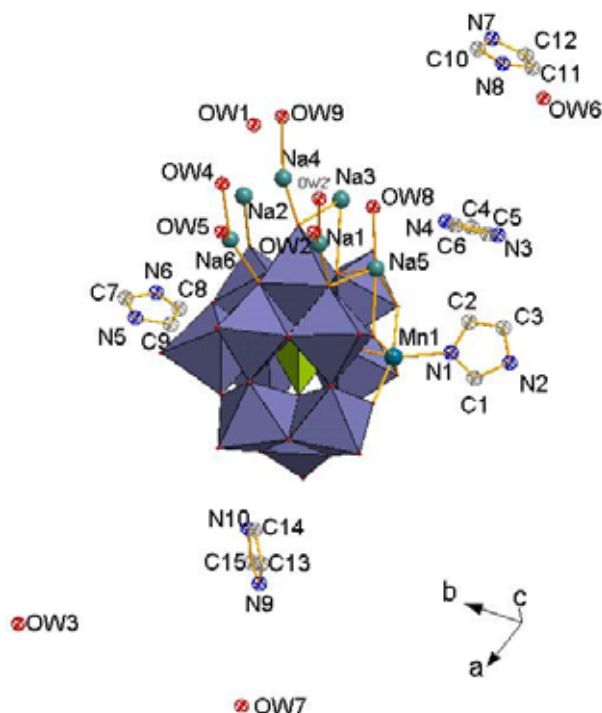

**Figure S3.** The molecular structure of compound **2**, showing the positions of polyanion and counteractions  $\text{Na}^+$ , and  $\text{H}_2\text{O}$  and  $\text{Im}$  molecules. Hydrogen atoms are omitted for clarity.

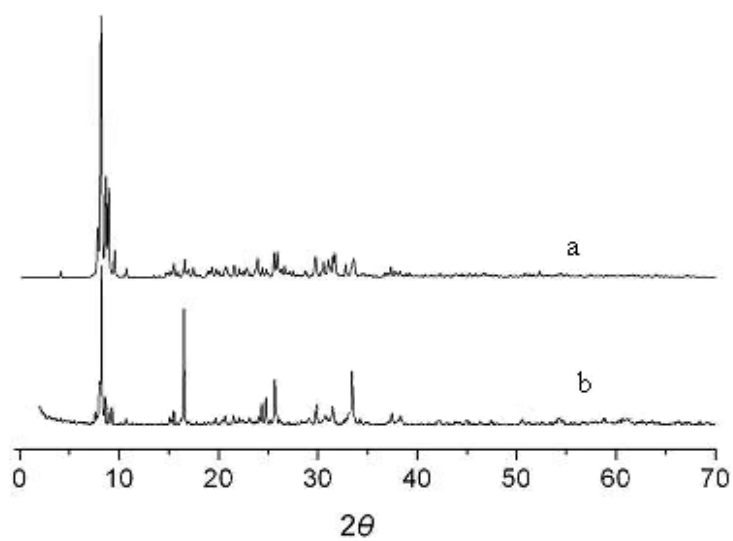

**Figure S4.** (a) Simulated and (b) experimental XRPD patterns of compound **1**.

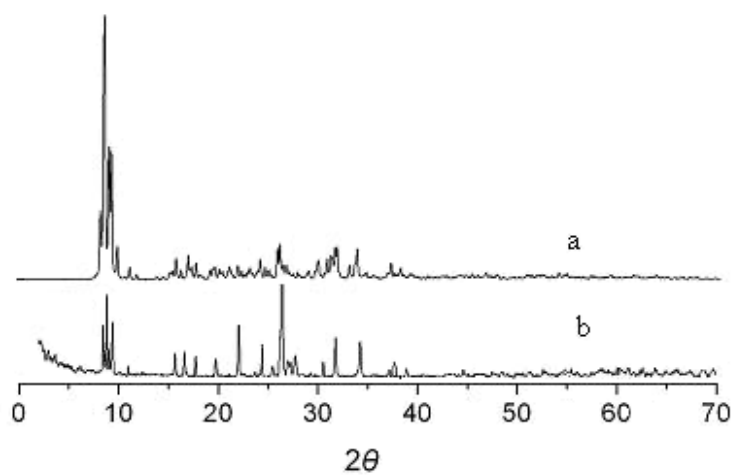

**Figure S5.** (a) Simulated and (b) experimental XRPD patterns of compound **2**.

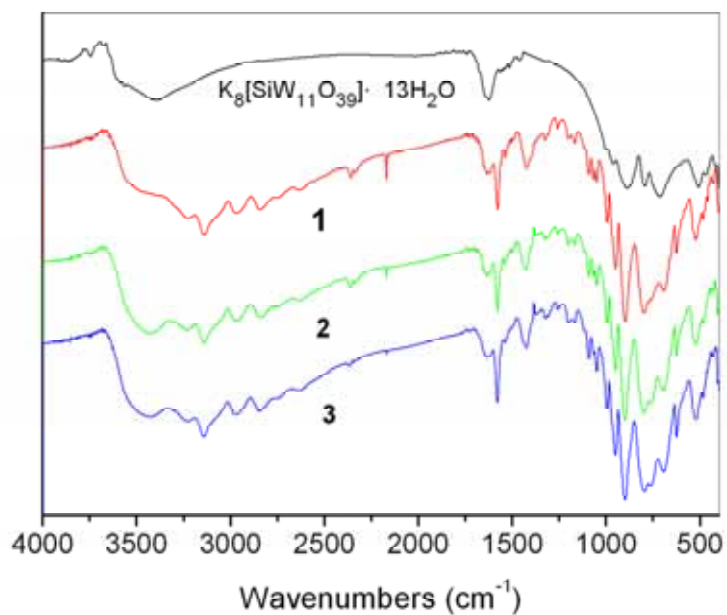

**Figure S6.** IR spectra for precursor, compounds **1**, **2** and **3**.

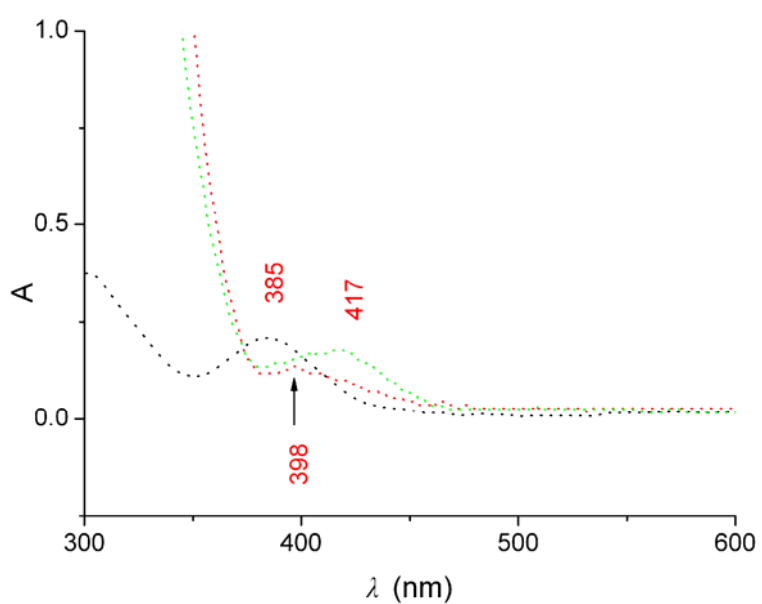

**Figure S7.** UV-vis spectra of the solution of compound **1** (green),  $[SiW_{11}O_{39}Ni(H_2O)]^{6-}$  (red) and Ni complexes (black) in distilled water.

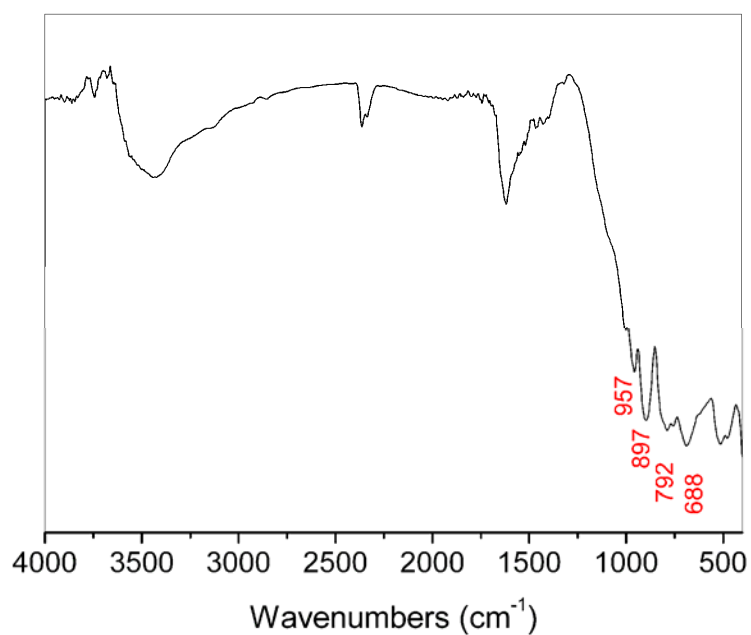

**Figure S8.** IR spectrum of compound **1** after heated to 550 °C.

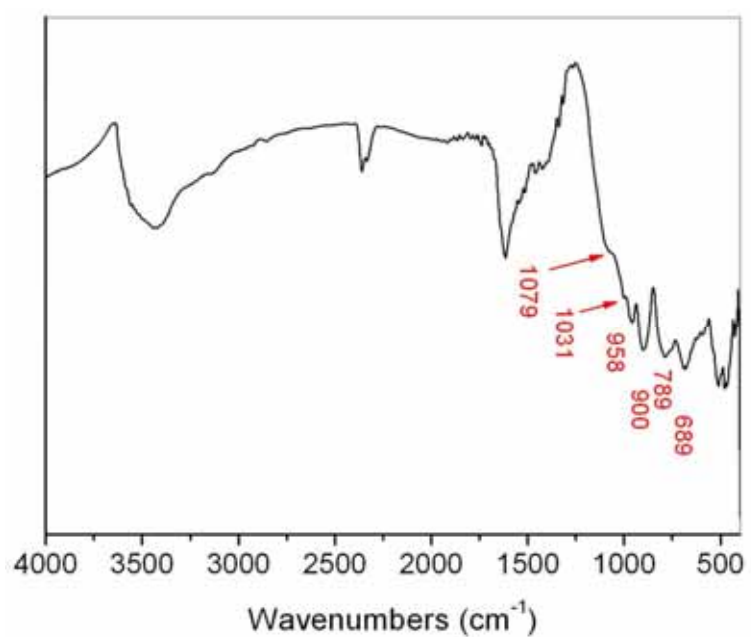

**Figure S9.** IR spectrum of compound **2** after heated to 550 °C.

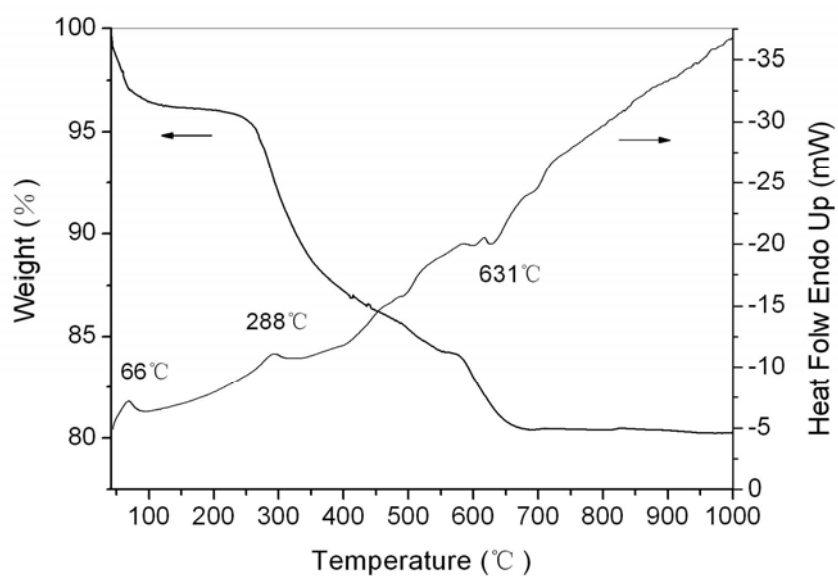

**Figure S10.** TG and DTA curves of compound 1.

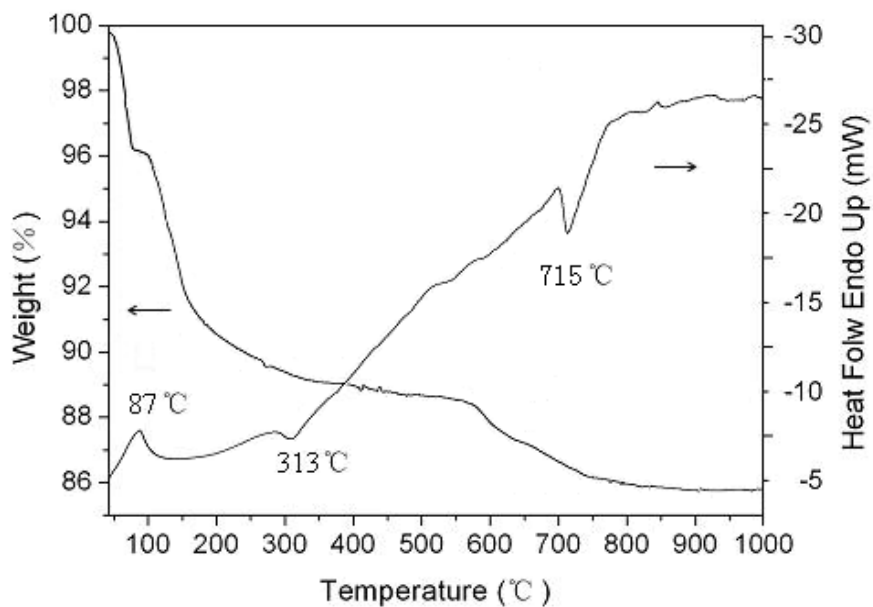

**Figure S11.** TG and DTA curves of compound 2.

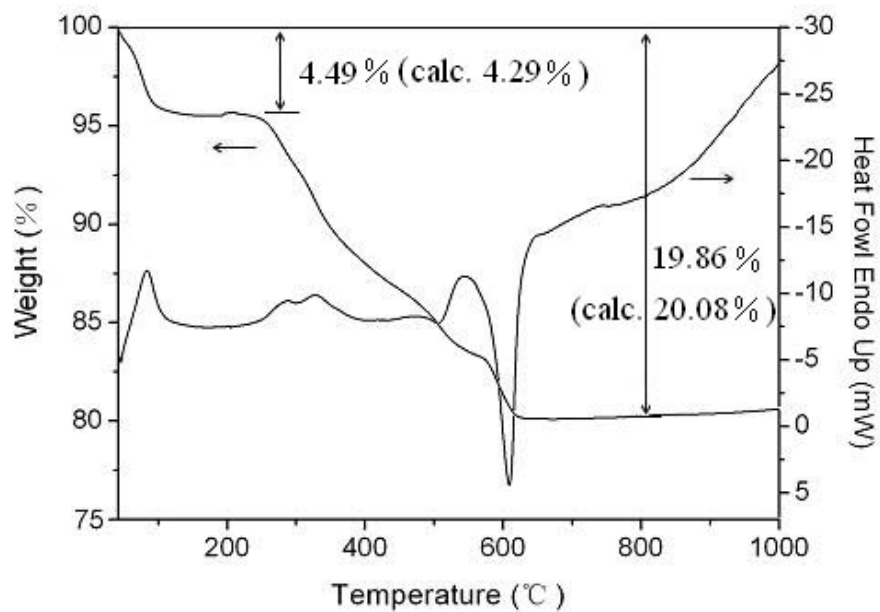

**Figure S12.** TG and DTA curves of compound 3.

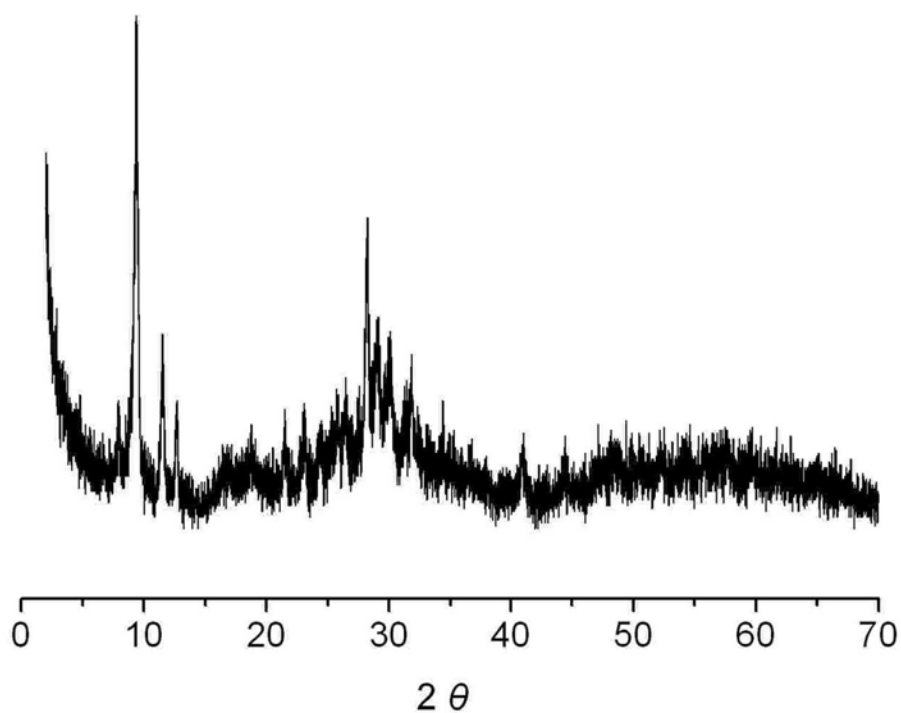

**Figure S13.** Experimental XRPD patterns of compound 1 after heated to 550 °C.



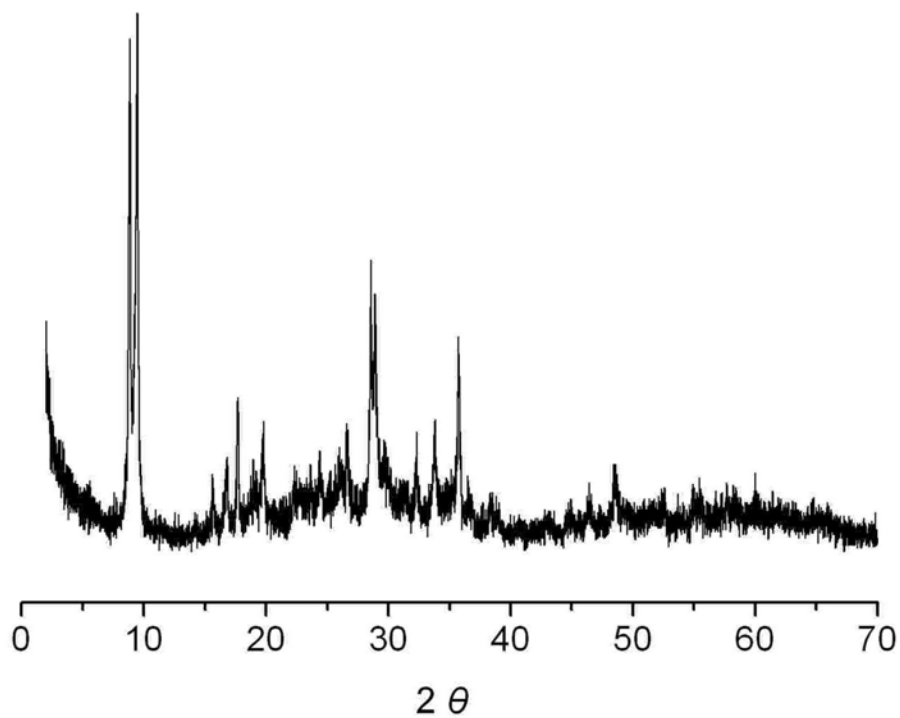

**Figure S14.** Experimental XRPD patterns of compound **2** after heated to 550 °C.

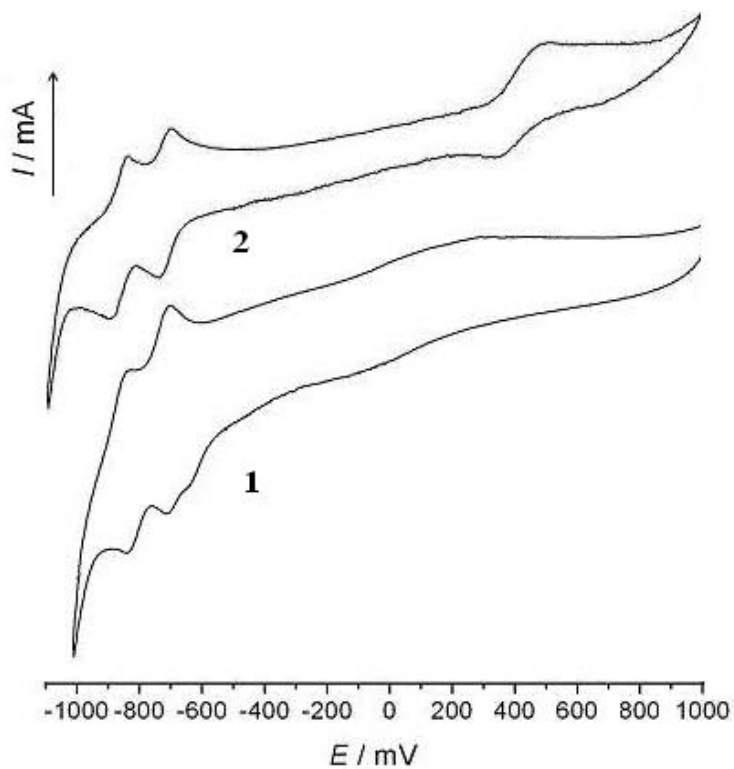

**Figure S15.** Cyclic voltammograms of compounds **1** and **2** (glassy-carbon working electrode, scan-rate  $50\text{mV s}^{-1}$ , 0.5 M KAc/HAc buffer solution, pH 4.7).



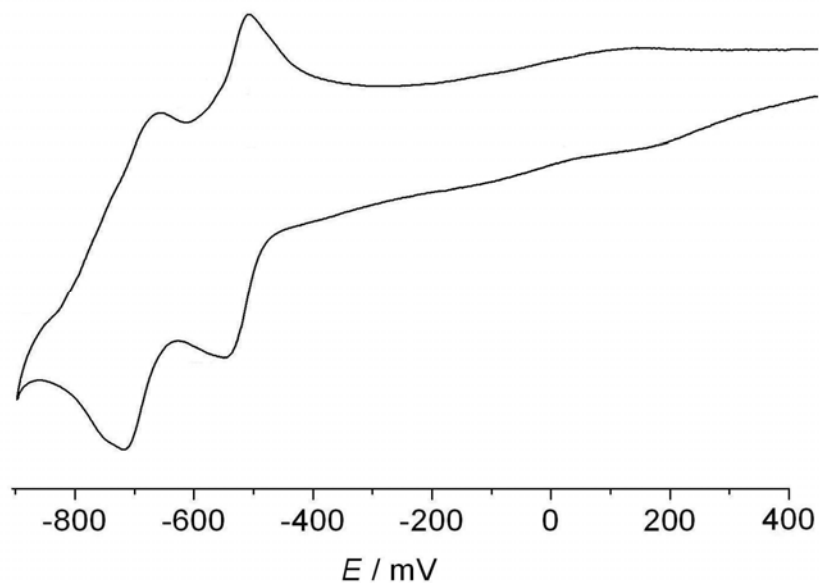

**Figure S16.** Cyclic voltammogram of compound  $[\text{SiW}_{11}\text{O}_{39}\text{Ni}(\text{H}_2\text{O})]^{6-}$  (glassy-carbon working electrode, scan-rate  $50\text{mV s}^{-1}$ ,  $0.5\text{ M KAc/HAc}$  buffer solution, pH 4.7).

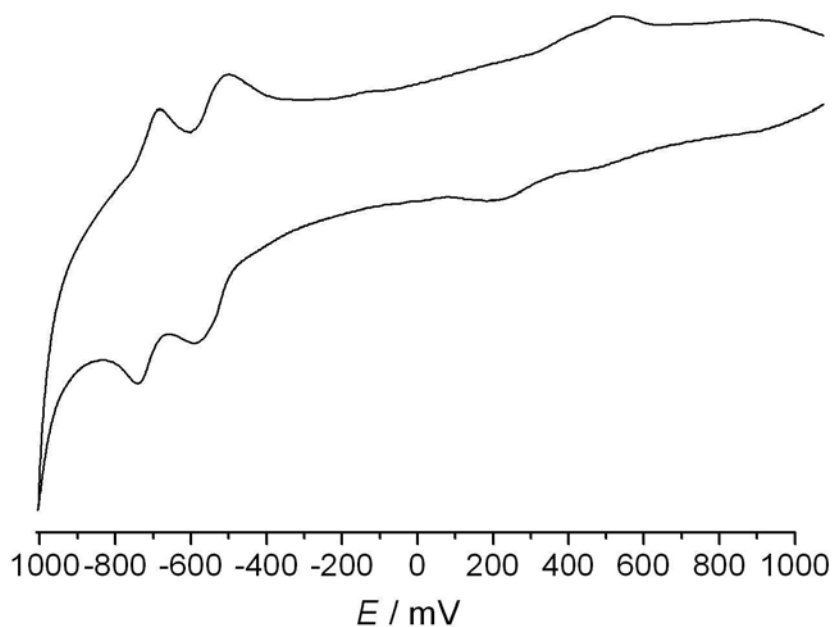

**Figure S17.** Cyclic voltammogram of compound  $[\text{SiW}_{11}\text{O}_{39}\text{Mn}(\text{H}_2\text{O})]^{6-}$  (glassy-carbon working electrode, scan-rate  $50\text{mV s}^{-1}$ ,  $0.5\text{ M KAc/HAc}$  buffer solution, pH 4.7).

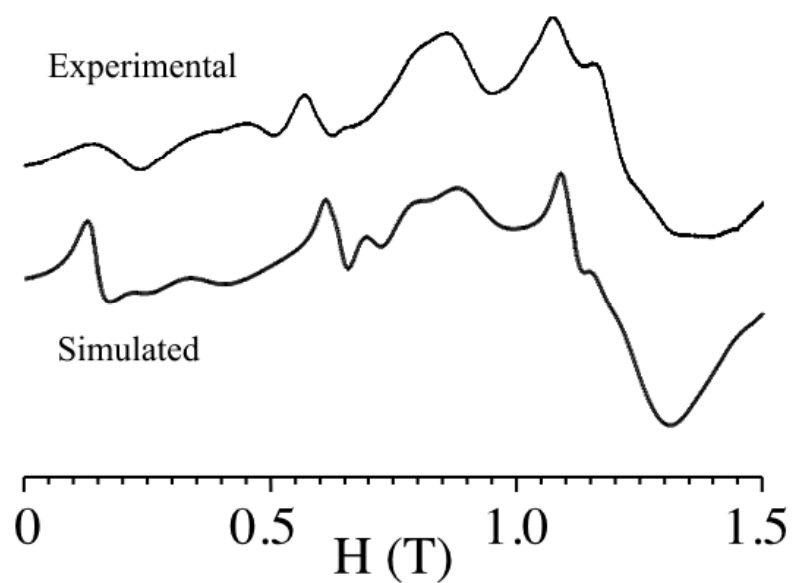

**Figure S18.** Experimental and simulated EPR spectra at 15 K of compound **2**.

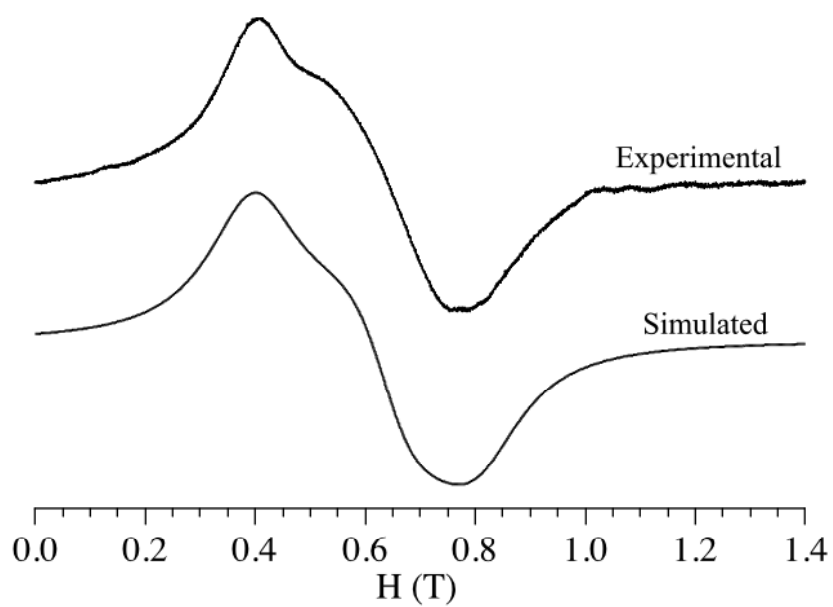

**Figure S19.** Experimental and simulated EPR spectra at 50 K of compound **3**.

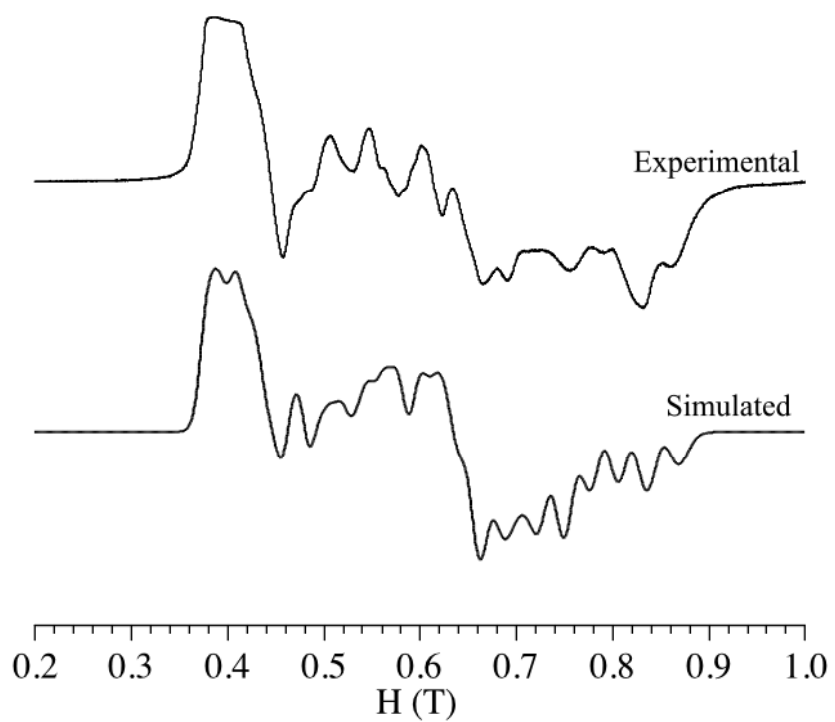

**Figure S20.** Experimental and simulated EPR spectra at 5 K of compound **3**.
